# Supplementary material for: Development and characterization of the first dsRNA-resistant insect population from western corn rootworm, Diabrotica virgifera virgifera LeConte
Source: PLoS One. 2018 May 14;13(5):e0197059. doi: 10.1371/journal.pone.0197059 (PMC5951553; doi:10.1371/journal.pone.0197059)
Supplement: S4 Table — (XLSX) [file pone.0197059.s008.xlsx]

## Sheet: Supplementary table 4
Each marker is listed along with its estimated position in centimorgans on linkage group 4.

## Sheet: Data
marker name	map position (cM)
CRW168	0
CRW1048	75.97
CRW1215	88.31
CRW1717	88.31
CRW1848	88.31
CRW972	88.31
CRW164	88.99
CRW162	91.93
CRW796	92.74
CRW1828	94.45
CRW214	94.45
CRW1327	98.15
CRW1879	98.15
CRW1882	103.28
CRW817	103.46
CRW876	104.51
CRW2019	108.94
CRW1323	110.39
CRW1757	110.39
CRW1557	114
CRW2476	118.97
CRW934	119.96
CRW1888	126.62
CRW2436	127.57
CRW740	128.38
CRW798	130.3
CRW1312	132.81
CRW1771	132.81
CRW1447	135.26
CRW1507	135.26
CRW228	135.26
CRW2423	135.26
CRW1436	140.44
CRW1451	140.44
CRW1990	140.44
CRW2067	140.44
CRW765	140.44
CRW1629	141.63
CRW490	141.63
CRW874	141.63
CRW1220	146.47
CRW2069	146.47
CRW2186	146.47
CRW134	149.33
CRW1094	151.47
CRW1133	151.47
CRW1770	151.47
CRW1887	151.47
CRW1893	151.47
CRW2013	151.5
CRW2358	152.61
CRW312	156.77
CRW160	162.01
CRW1731	162.01
CRW1384	164.77
CRW941	166.41
CRW2174	170.95
CRW325	173.38
CRW1774	178.93
CRW2051	178.93
CRW2164	179.12
CRW637	179.12
CRW1978	183.84
CRW2396	183.84
CRW771	183.84
CRW838	192.82
CRW344	213.4
